# Supplementary material for: Ferroportin disease: pathogenesis, diagnosis and treatment
Source: PubMed Central journal article supplement — Haematologica. 2017 Nov 3;102(12):1972–84. doi: 10.3324/haematol.2017.170720 (PMC5709096; doi:10.3324/haematol.2017.170720), 2017-12
Supplement: 2017_170720-Disclosure.pdf [file 2017_170720-Disclosure.pdf]

Haematologica  
HAEMATOL/2017/170720  
Version 4

The ferroportin disease: pathogenesis, diagnosis and treatment

Antonello Pietrangelo

Disclosures: None
